# Supplementary material for: Multifunctional properties and multi-energy storage in the [(CH 3 ) 3 S][FeCl 4 ] plastic crystal
Source: Royal Society of Chemistry journal article supplement (doi:10.1039/d0tc04044d), 2020-01-01
Supplement: d0tc04044d1.pdf [file d0tc04044d1.pdf]

## Electronic Supplementary Information

### Multifunctional properties and multi-energy storage in the [(CH<sub>3</sub>)<sub>3</sub>S][FeCl<sub>4</sub>] plastic crystal

Jorge Salgado-Beceiro<sup>a</sup>, Juan Manuel Bermúdez-García<sup>a</sup>, Antonio Luis Llamas-Saiz<sup>b</sup>, Socorro Castro-García<sup>a</sup>, María Antonia Señarís-Rodríguez<sup>a</sup>, Francisco Rivadulla<sup>c</sup>, Manuel Sánchez-Andújar<sup>a</sup>

<sup>a</sup> University of A Coruna, QuiMolMat Group, Dpt. Chemistry, Faculty of Science and Advanced Scientific Research Center (CICA), Zapateira, 15071 A Coruña, Spain.

<sup>b</sup> RIAIDT X-ray Unit, Universidade of Santiago de Compostela, 15782 Santiago de Compostela, Spain.

<sup>c</sup> Centro Singular de Investigación en Química Biolóxica e Materiais Moleculares (CiQUS), Departamento de Química-Física, Universidade de Santiago de Compostela. 17582 Santiago de Compostela (Spain)

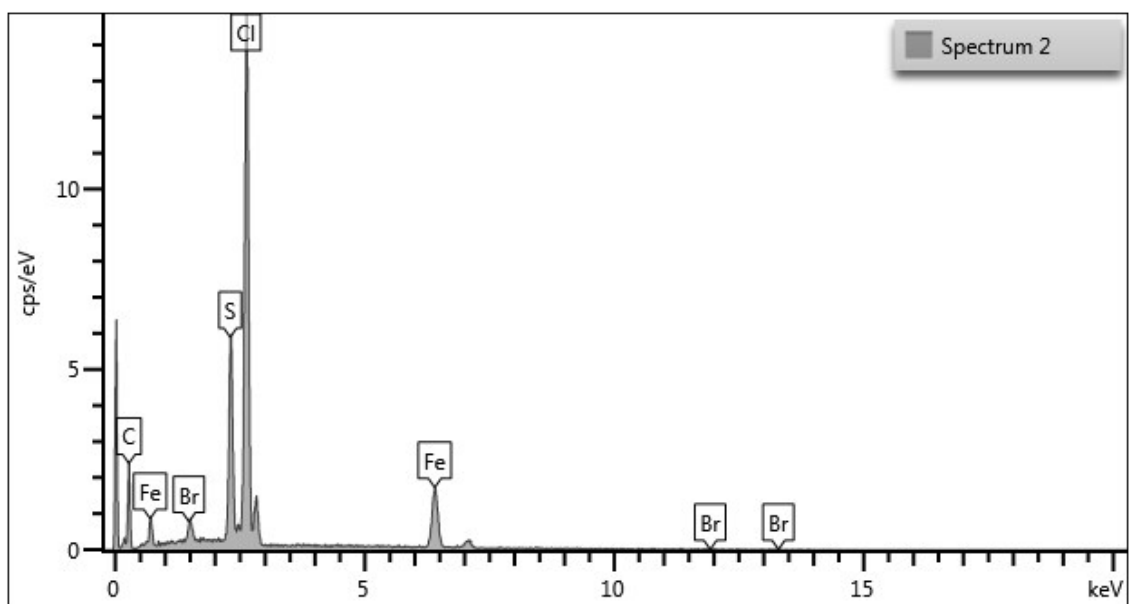

**Figure S1.** Energy dispersive X-ray spectrum of the  $[(CH_3)_3S][FeCl_4]$  compound.

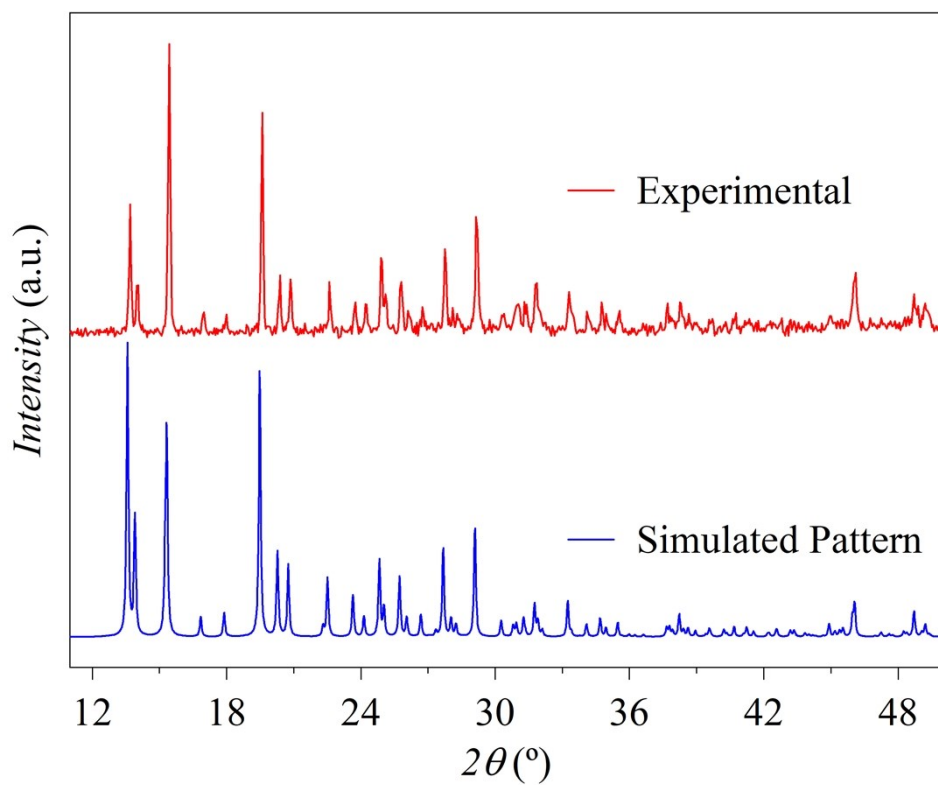

**Figure S2.** Room temperature experimental PXRD patterns for the obtained  $[(\text{CH}_3)_3\text{S}][\text{FeCl}_4]$  compound together with the simulated patterns based on its single crystal structure at room temperature.

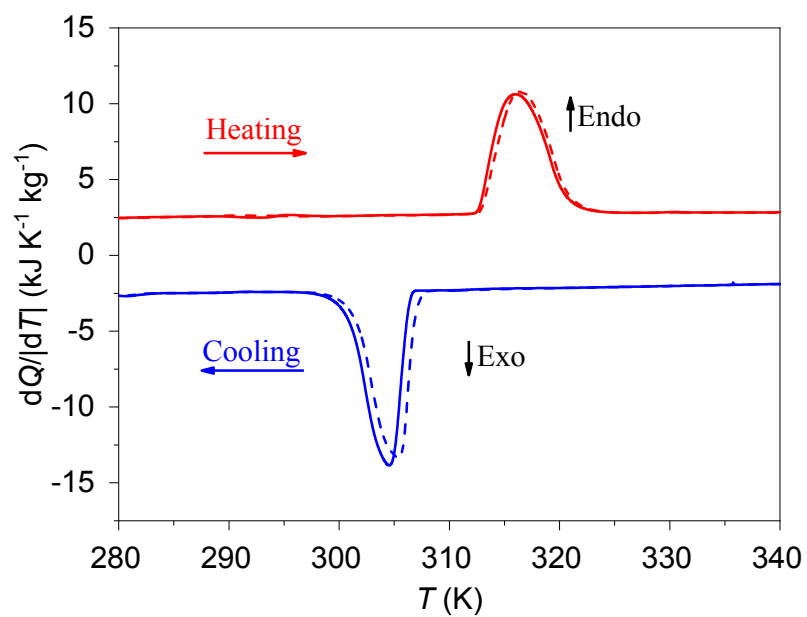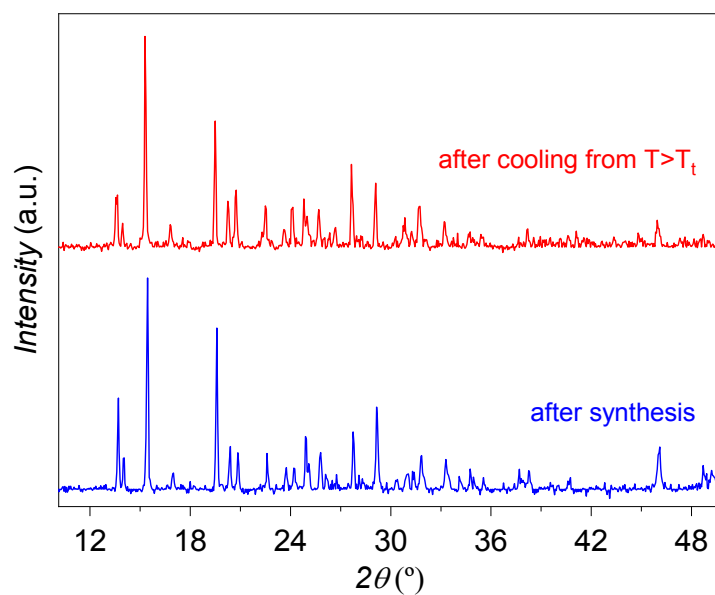

**Figure S3. Top:** Several DSC curves (solid line first cycle and dash line second cycle) for  $[(\text{CH}_3)_3\text{S}][\text{FeCl}_4]$  compound. **Bottom:** Room temperature PXRD patterns for the obtained  $[(\text{CH}_3)_3\text{S}][\text{FeCl}_4]$  compound after synthesis (blue line) and after cooling from  $T > T_t$  (red line).

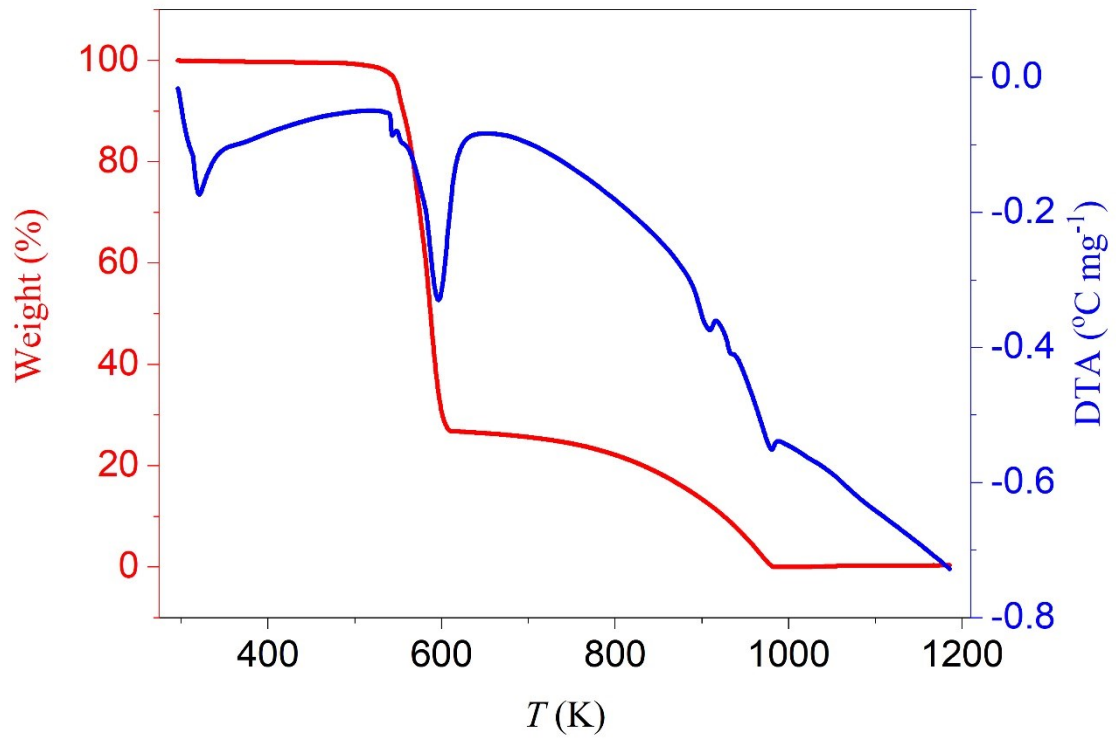

**Figure S4.** TGA and DTA decomposition curves for the  $[(\text{CH}_3)_3\text{S}][\text{FeCl}_4]$  compound.

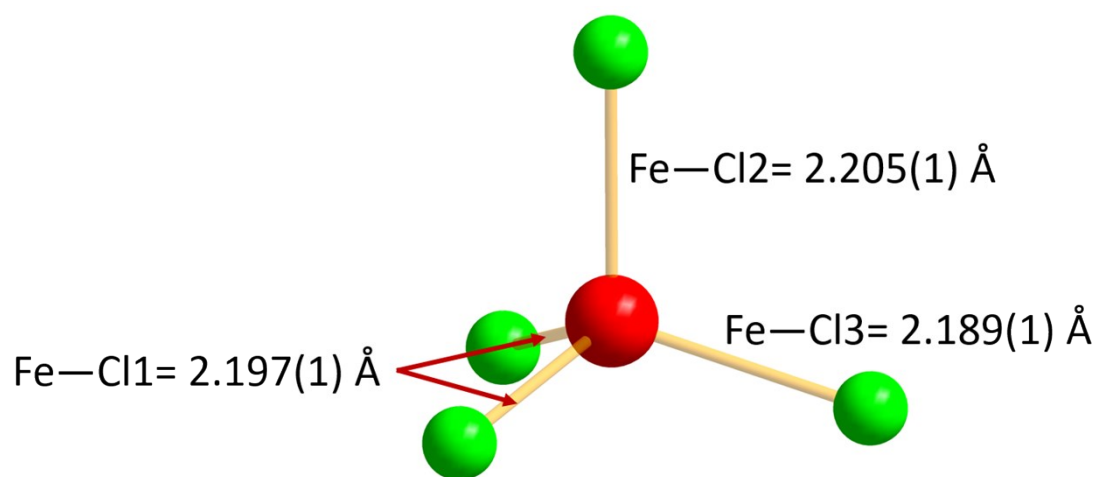

**Figure S5.** Detail of the crystal structure of the  $[(\text{CH}_3)_3\text{S}][\text{FeCl}_4]$  compound showing the three different Fe-Cl distances present in the  $[\text{FeCl}_4]^-$  anions at 100K.

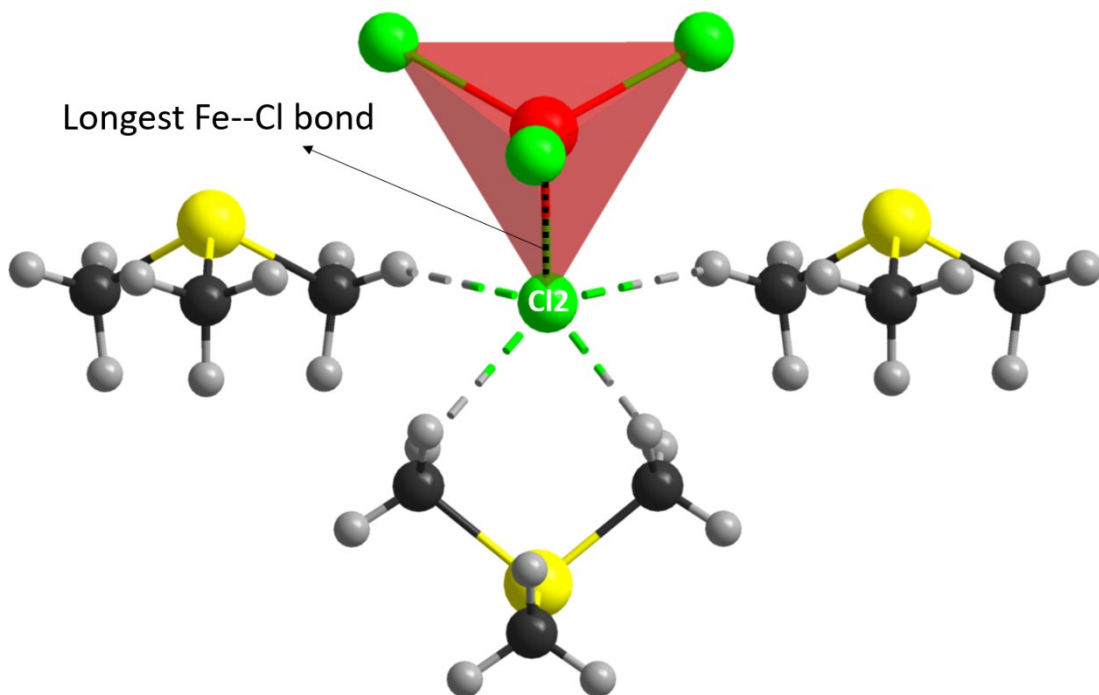

**Figure S6.** Detail of the crystal structure of the  $[(\text{CH}_3)_3\text{S}][\text{FeCl}_4]$  compound at 100K showing the interactions between one Cl-atom of  $[\text{FeCl}_4]^-$  with four H-atoms of methyl groups of three  $[(\text{CH}_3)_3\text{S}]^+$  cations.

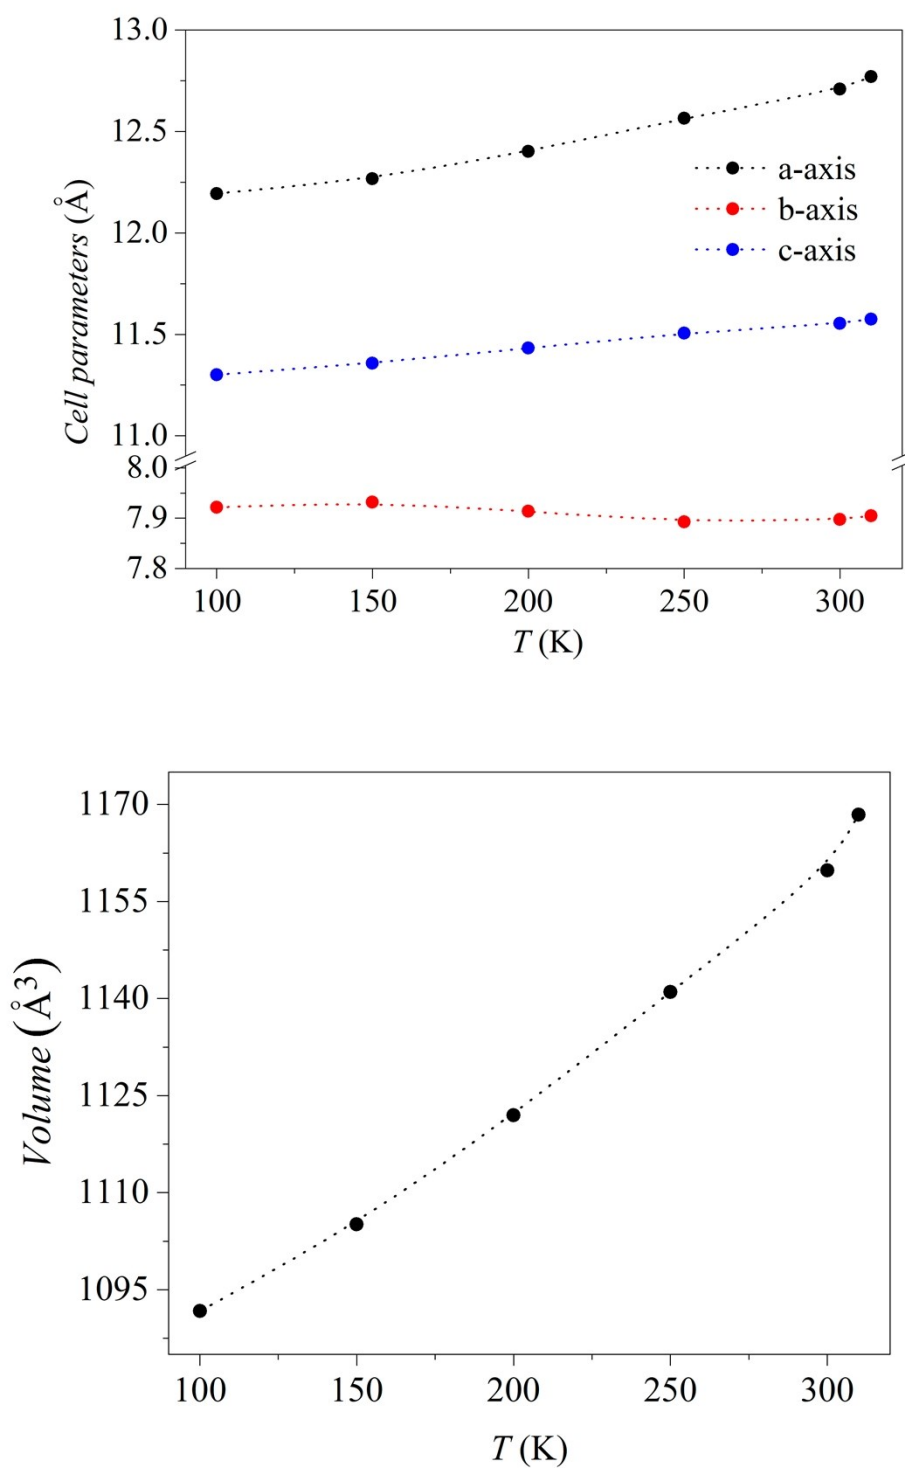

**Figure S7. Top:** Thermal evolution of the cell parameters of the LT-polymorph of  $[(\text{CH}_3)_3\text{S}][\text{FeCl}_4]$ . **Bottom:** Thermal evolution of the volume of the LT-polymorph of  $[(\text{CH}_3)_3\text{S}][\text{FeCl}_4]$ .



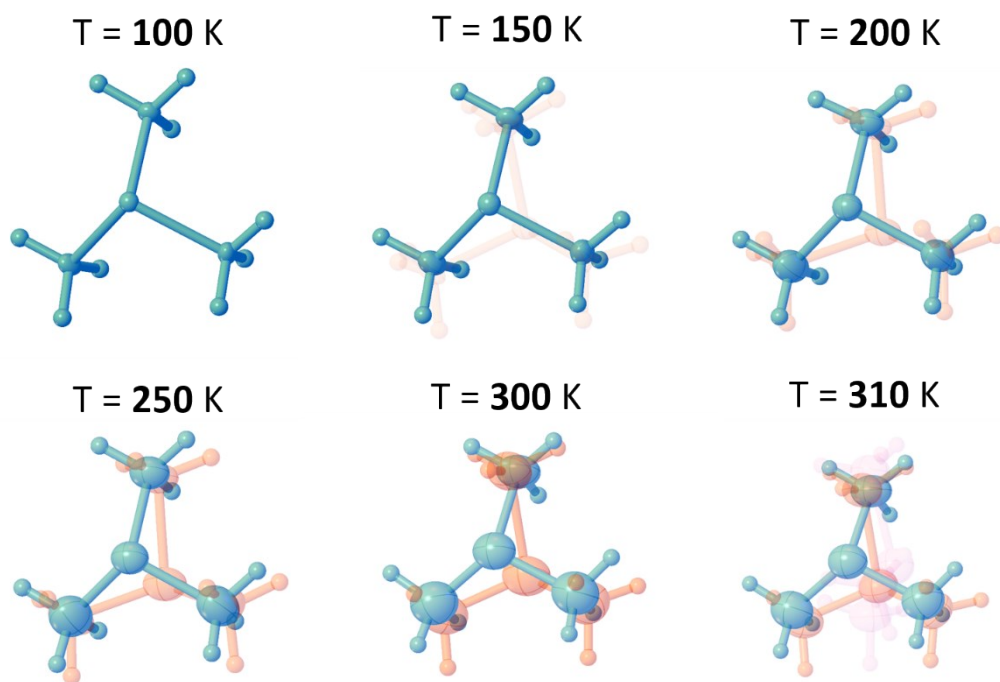

**Figure S8.** Detail of the crystal structure of  $[(\text{CH}_3)_3\text{S}][\text{FeCl}_4]$  showing the disorder of the  $[(\text{CH}_3)_3\text{S}]^+$  cations at different temperatures between 100, 150, 200, 250, 300 and 310K (from left top to right bottom). The ellipsoid shows a probability of 30%. Hydrogen atoms shown as spheres of fixed radius. Refined atomic population parameters are used for transparency level (%), see Table S3 for numerical values.

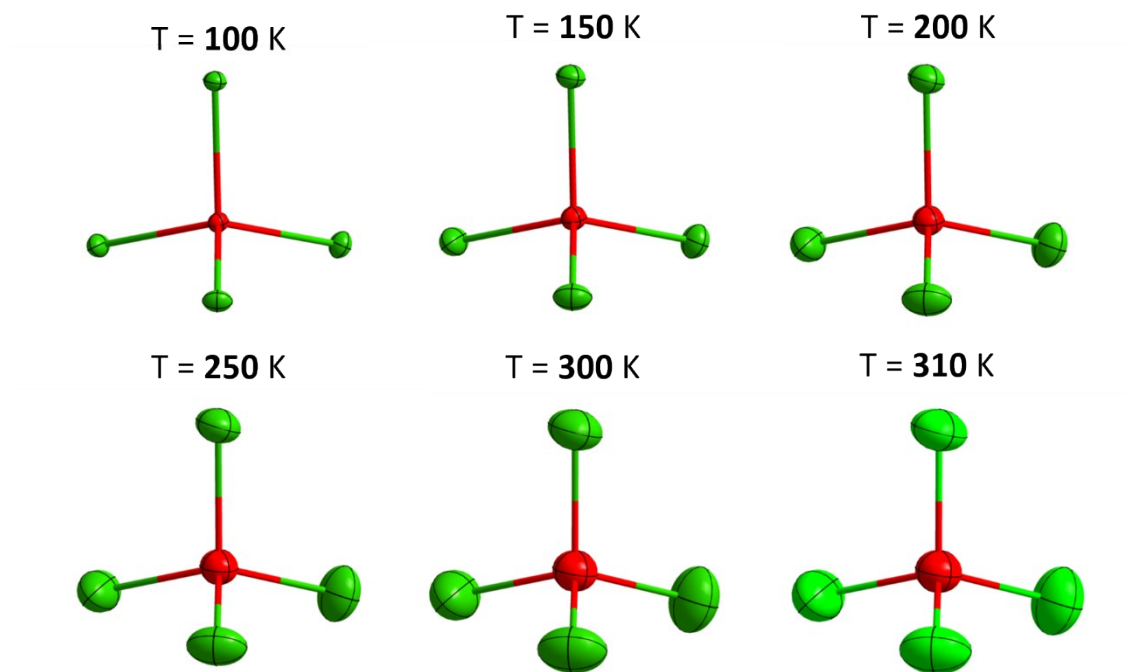

**Figure S9.** Detail of the crystal structure of  $[\text{FeCl}_4]^-$  tetrahedral at different temperatures between 100, 150, 200, 250, 300 and 310 K (from left top to right bottom). The ellipsoid shows a probability of 30%.

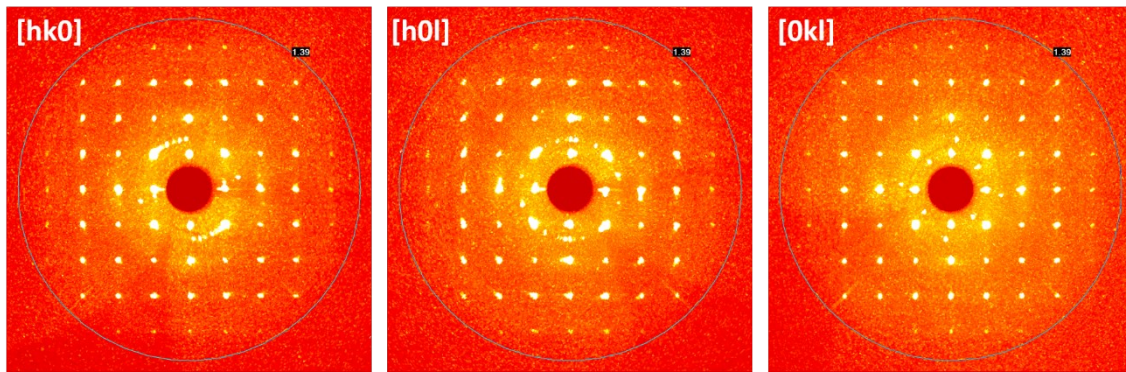

**Figure S10.** Precession images generated from single-crystal X-ray diffraction data of the HT-polymorph obtained along the main axis.

**Table S1.** Crystal data and structure refinement for  $[(\text{CH}_3)_3\text{S}][\text{FeCl}_4]$ .

|                                                  |                                                   |                                                   |                                                   |                                                   |                                                |                                                   |                                  |
|--------------------------------------------------|---------------------------------------------------|---------------------------------------------------|---------------------------------------------------|---------------------------------------------------|------------------------------------------------|---------------------------------------------------|----------------------------------|
| Empirical formula                                | $\text{C}_3\text{H}_9\text{S FeCl}_4$             |                                                   |                                                   |                                                   |                                                |                                                   |                                  |
| Wavelength (Å)                                   | 0.71073                                           |                                                   |                                                   |                                                   |                                                |                                                   |                                  |
| Crystal size (mm <sup>3</sup> )                  | 0.170 x 0.100 x 0.056                             |                                                   |                                                   |                                                   |                                                |                                                   |                                  |
| Formula weight                                   | 274.81                                            |                                                   |                                                   |                                                   |                                                |                                                   |                                  |
| F(000)                                           | 548                                               |                                                   |                                                   |                                                   |                                                |                                                   |                                  |
| Temperature (K)                                  | 100                                               | 150                                               | 200                                               | 250                                               | 300                                            | 310                                               | Proposed SG                      |
| Crystal system                                   | Orthorhombic                                      | Orthorhombic                                      | Orthorhombic                                      | Orthorhombic                                      | Orthorhombic                                   | Orthorhombic                                      | Cubic?                           |
| Space group                                      | <i>Pnma</i>                                       | <i>Pnma</i>                                       | <i>Pnma</i>                                       | <i>Pnma</i>                                       | <i>Pnma</i>                                    | <i>Pnma</i>                                       | <i>Pm-3m</i> ?                   |
| Unit cell dimensions (Å)                         | a = 12.1950(7)<br>b = 7.9217(4)<br>c = 11.3013(6) | a = 12.2667(8)<br>b = 7.9320(5)<br>c = 11.3580(7) | a = 12.4012(4)<br>b = 7.9136(2)<br>c = 11.4326(4) | a = 12.5644(5)<br>b = 7.8927(3)<br>c = 11.5059(4) | a = 12.707(4)<br>b = 7.900(2)<br>c = 11.551(4) | a = 12.7698(9)<br>b = 7.9044(5)<br>c = 11.5756(8) | a = 6.6626(13)                   |
| Volume (Å <sup>3</sup> )                         | 1091.71(10)                                       | 1105.13(12)                                       | 1121.97(6)                                        | 1141.01(7)                                        | 1159.6(6)                                      | 1168.41(14)                                       | 295.75(17)                       |
| Z                                                | 4                                                 | 4                                                 | 4                                                 | 4                                                 | 4                                              | 4                                                 | 1                                |
| Density calculated (Mg/m <sup>3</sup> )          | 1.672                                             | 1.652                                             | 1.627                                             | 1.600                                             | 1.574                                          | 1.562                                             | -                                |
| Absorption coefficient (mm <sup>-1</sup> )       | 2.482                                             | 2.452                                             | 2.415                                             | 2.375                                             | 2.337                                          | 2.319                                             | 2.290                            |
| Tmin, Tmax                                       | 0.72, 0.87                                        | 0.65, 0.88                                        | 0.74, 0.88                                        | 0.74, 0.88                                        | 0.74, 0.88                                     | 0.72, 0.88                                        | 0.61, 0.82                       |
| Theta range for data collection (°)              | 2.46 - 36.37                                      | 2.44 - 33.16                                      | 2.42 - 33.13                                      | 2.40 - 29.57                                      | 2.38 - 27.13                                   | 2.38 - 26.72                                      | 3.06 - 15.15                     |
| Index ranges                                     | -20<=h<=20<br>-13<=k<=13<br>-18<=l<=18            | -17<=h<=18<br>-12<=k<=12<br>-17<=l<=17            | -17<=h<=19<br>-12<=k<=12<br>-17<=l<=17            | -16<=h<=17<br>-10<=k<=10<br>-15<=l<=15            | -15<=h<=16<br>-10<=k<=10<br>-14<=l<=14         | -15<=h<=16<br>-10<=k<=9<br>-14<=l<=14             | -4<=h<=4<br>-4<=k<=4<br>-4<=l<=4 |
| Measured reflections                             | 65618                                             | 16182                                             | 17487                                             | 13914                                             | 11340                                          | 11256                                             | 2763                             |
| Independent reflections                          | 2802 [R(int)=0.0488]                              | 2241 [R(int)=0.0417]                              | 2260 [R(int)=0.0369]                              | 1702 [R(int)=0.0390]                              | 1372 [R(int)=0.0365]                           | 1324 [R(int)=0.0332]                              | 24 [R(int)=0.0588]               |
| Indep. Reflections [ $I > 2\sigma(I)$ ]          | 2420                                              | 1726                                              | 1715                                              | 1194                                              | 889                                            | 844                                               | 24                               |
| Completeness (%)                                 | 99.8                                              | 99.9                                              | 99.8                                              | 99.8                                              | 99.9                                           | 99.9                                              | 100                              |
| Refinement method                                | Full-matrix least-squares on F <sup>2</sup>       |                                                   |                                                   |                                                   |                                                |                                                   |                                  |
| Data / restraints / parameters                   | 2802 / 0 / 63                                     | 2241 / 94 / 83                                    | 2260 / 94 / 83                                    | 1702 / 94 / 83                                    | 1372 / 94 / 83                                 | 1324 / 219 / 121                                  | -                                |
| Goodness-of-fit on F <sup>2</sup>                | 1.102                                             | 1.057                                             | 1.031                                             | 1.022                                             | 1.030                                          | 1.050                                             | -                                |
| Final R indices [ $I > 2\sigma(I)$ ]             | R1 = 0.0288<br>wR2 = 0.0603                       | R1 = 0.0345<br>wR2 = 0.0601                       | R1 = 0.0343<br>wR2 = 0.0719                       | R1 = 0.0401<br>wR2 = 0.0938                       | R1 = 0.0484<br>wR2 = 0.1254                    | R1 = 0.0378<br>wR2 = 0.0933                       | -                                |
| R indices (all data)                             | R1 = 0.0377<br>wR2 = 0.0652                       | R1 = 0.0542<br>wR2 = 0.0680                       | R1 = 0.0514<br>wR2 = 0.0827                       | R1 = 0.0602<br>wR2 = 0.1090                       | R1 = 0.0764<br>wR2 = 0.1493                    | R1 = 0.0621<br>wR2 = 0.1113                       | -                                |
| Largest diff. peak and hole (e-Å <sup>-3</sup> ) | 0.628 and -0.657                                  | 0.652 and -0.469                                  | 0.439 and -0.410                                  | 0.560 and -0.374                                  | 0.522 and -0.262                               | 0.230 and -0.215                                  | -                                |

**Table S2.** Interactions between Cl-atoms of  $[\text{FeCl}_4]^-$  with t H-atoms of methyl group of  $[(\text{CH}_3)_3\text{S}]^+$  cations at different temperatures (distances in Å, °). Atoms labelled as ^a, ^b or ^c according to different disordered positions for the cation.

|        | D-H       | H...A   | D...A      | <(DHA)    |                       |
|--------|-----------|---------|------------|-----------|-----------------------|
| T=100K | 0.97(2)   | 2.79(2) | 3.6488(15) | 147.0(17) | C1-H1B...Cl2_i        |
|        | 0.92(2)   | 2.79(2) | 3.6251(15) | 150.9(17) | C1-H1C...Cl2_ii       |
| T=150K | 0.98      | 2.84    | 3.676(6)   | 144.0     | C1^a-H1B^a...Cl2_i    |
|        | 0.98      | 2.75    | 3.632(6)   | 150.0     | C1^a-H1C^a...Cl2_iii  |
|        | 0.98      | 3.00    | 3.73(6)    | 132.4     | C1B^b-H1D^b...Cl2_iii |
|        | 0.98      | 2.72    | 3.46(5)    | 132.2     | C1B^b-H1D^b...Cl3     |
|        | 0.98      | 2.67    | 3.55(6)    | 149.1     | C1B^b-H1E^b...Cl2_i   |
|        | 0.98      | 2.92    | 3.63(5)    | 129.5     | C1B^b-H1F^b...Cl1_iv  |
|        | 0.965(19) | 2.97(3) | 3.64(6)    | 128(3)    | C2B^b-H2E^b...Cl1_iii |
| T=200K | 0.98      | 2.87    | 3.675(7)   | 140.5     | C1^a-H1B^a...Cl2_i    |
|        | 0.98      | 2.78    | 3.674(7)   | 152.5     | C1^a-H1C^a...Cl2_iii  |
|        | 0.98      | 2.83    | 3.59(2)    | 135.0     | C1B^b-H1D^b...Cl2_iii |
|        | 0.98      | 2.88    | 3.547(16)  | 126.2     | C1B^b-H1D^b...Cl3     |
|        | 0.98      | 2.87    | 3.73(2)    | 147.9     | C1B^b-H1E^b...Cl2_i   |
| T=250K | 0.97      | 2.88    | 3.630(15)  | 134.4     | C1^a-H1B^a...Cl1_iv   |
|        | 0.97      | 2.95    | 3.697(14)  | 134.8     | C1^a-H1B^a...Cl2_i    |
|        | 0.97      | 2.81    | 3.704(14)  | 154.0     | C1^a-H1C^a...Cl2_iii  |
|        | 0.97      | 2.84    | 3.63(3)    | 139.5     | C1B^b-H1D^b...Cl2_iii |
|        | 0.97      | 2.93    | 3.50(3)    | 118.3     | C1B^b-H1D^b...Cl3     |
|        | 0.97      | 2.95    | 3.75(3)    | 141.1     | C1B^b-H1E^b...Cl2_i   |
| T=300K | 0.96      | 2.75    | 3.576(15)  | 144.6     | C1^a-H1B^a...Cl1_iv   |
|        | 0.96      | 2.80    | 3.702(18)  | 157.4     | C1^a-H1C^a...Cl2_iii  |
|        | 0.96      | 2.77    | 3.44(2)    | 127.8     | C1B^b-H1D^b...Cl3     |
|        | 0.96      | 2.84    | 3.70(3)    | 149.5     | C1B^b-H1E^b...Cl2_i   |
|        | 0.94(2)   | 2.98(3) | 3.65(3)    | 129.6(17) | C2B^b-H2E^b...Cl1_iii |
| T=310K | 0.96      | 2.81    | 3.585(11)  | 138.0     | C1^a-H1B^a...Cl1_iv   |
|        | 0.96      | 2.84    | 3.707(14)  | 150.0     | C1^a-H1C^a...Cl2_iii  |
|        | 0.96      | 2.69    | 3.43(2)    | 134.9     | C1B^b-H1D^b...Cl3     |
|        | 0.96      | 2.79    | 3.69(3)    | 155.7     | C1B^b-H1E^b...Cl2_i   |
|        | 0.96      | 2.53    | 3.35(5)    | 143.4     | C1C^c-H1I^c...Cl1_iii |
|        | 0.96      | 2.81    | 3.72(6)    | 158.3     | C2C^c-H1J^c...Cl1_v   |
|        | 0.96      | 2.71    | 3.48(7)    | 137.3     | C2C^c-H1L^c...Cl1_iii |
|        | 0.96      | 2.92    | 3.70(6)    | 138.6     | C3C^c-H1M^c...Cl1     |
|        | 0.96      | 2.81    | 3.44(4)    | 124.6     | C3C^c-H1O^c...Cl3_i   |

Symmetry operations:

- (i)  $-x+1, -y+1, -z+1$
- (ii)  $x-1/2, -y+3/2, -z+1/2$
- (iii)  $x-1/2, y, -z+1/2$
- (iv)  $-x+1/2, -y+1, z+1/2$
- (v)  $x-1/2, -y+1/2, -z+1/2$

**Table S3.**  $[(\text{CH}_3)_3\text{S}]^+$  cation disorder vs temperature.

| Temperature (K) | No disordered positions | Refined population parameters (%)         |
|-----------------|-------------------------|-------------------------------------------|
| 100             | 1*                      | 100                                       |
| 150             | 2                       | 92.3(2) / 7.7(2)                          |
| 200             | 2                       | 81.1(2) / 18.9(2)                         |
| 250             | 2                       | 71.4(3) / 28.6(3)                         |
| 300             | 2                       | 65.2(5) / 34.8(5)                         |
| 310             | 4                       | 60.0(3) / 25.7(3) / 7.11(14) / 7.11(14)** |

(\*) There are some low electron density residual peaks in the Fourier difference map that allow to construct and refine (with many constrains) a disordered model for  $[(\text{CH}_3)_3\text{S}]^+$  in 2 orientations like that found at higher temperatures. The final refined population parameters are 99.07(13) / 0.93(13) %. It is a much more complicated model with no significant improvement in data fitting, therefore, the no disordered model is considered in the final refinement reported at 100K.

(\*\*) Last two population values are identical because they correspond to disordered positions related by a mirror symmetry plane.
